### Supplementary file 3

>rf 1 hCoV-19/Wuhan/WIV06/2019|EPI\_ISL\_402129|2019-12-30  
ADSFVIRGDEVRQIAPGQTGKIADYNYKLPDDFTGCVIAWN

>rf 1 hCoV-19/Wuhan/HBCDC-HB-04/2020|EPI\_ISL\_412980|2020-01-18  
ADSFVIRGDEVRQIAPGQTGKIADYNYKLPDDFTGCVIAWN

>rf 1 hCoV-19/Wuhan/HBCDC-HB-02/2020|EPI\_ISL\_412978|2020-01-17  
ADSFVIRGDEVRQIAPGQTGKIADYNYKLPDDFTGCVIAWN

>rf 1 hCoV-19/Wuhan/WIV07/2019|EPI\_ISL\_402130|2019-12-30  
ADSFVIRGDEVRQIAPGQTGKIADYNYKLPDDFTGCVIAWN

>rf 1 hCoV-19/Wuhan/HBCDC-HB-01/2019|EPI\_ISL\_402132|2019-12-30  
ADSFVIRGDEVRQIAPGQTGKIADYNYKLPDDFTGCVIAWN

>rf 1 hCoV-19/Wuhan/HBCDC-HB-02/2019|EPI\_ISL\_412898|2019-12-30  
ADSFVIRGDEVRQIAPGQTGKIADYNYKLPDDFTGCVIAWN

>rf 1 hCoV-19/Wuhan/HBCDC-HB-03/2019|EPI\_ISL\_412899|2019-12-30  
ADSFVIRGDEVRQIAPGQTGKIADYNYKLPDDFTGCVIAWN

>rf 1 hCoV-19/Wuhan/HBCDC-HB-03/2020|EPI\_ISL\_412979|2020-01-18  
ADSFVIRGDEVRQIAPGQTGKIADYNYKLPDDFTGCVIAWN

>rf 1 hCoV-19/Wuhan/IPBCAMS-WH-04/2019|EPI\_ISL\_403929|2019-12-30  
ADSFVIRGDEVRQIAPGQTGKIADYNYKLPDDFTGCVIAWN

>rf 1 hCoV-19/Wuhan/IPBCAMS-WH-03/2019|EPI\_ISL\_403930|2019-12-30  
ADSFVIRGDEVRQIAPGQTGKIADYNYKLPDDFTGCVIAWN

>rf 1 hCoV-19/Wuhan/IPBCAMS-WH-01/2019|EPI\_ISL\_402123|2019-12-244  
ADSFVIRGDEVRQIAPGQTGKIADYNYKLPDDFTGCVIAWN

>rf 1 hCoV-19/Wuhan/IVDC-HB-04/2020|EPI\_ISL\_402120|2020-01-01  
ADSFVIRGDEVRQIAPGQTGKIADYNYKLPDDFTGCVIAWN

>rf 1 hCoV-19/Wuhan/IPBCAMS-WH-05/2020|EPI\_ISL\_403928|2020-01-01  
ADSFVIRGDEVRQIAPGQTGKIADYNYKLPDDFTGCVIAWN

>rf 1 hCoV-19/Wuhan/WIV04/2019|EPI\_ISL\_402124|2019-12-30  
ADSFVIRGDEVRQIAPGQTGKIADYNYKLPDDFTGCVIAWN

>rf 1 hCoV-19/Wuhan/IVDC-HB-01/2019|EPI\_ISL\_402119|2019-12-30  
ADSFVIRGDEVRQIAPGQTGKIADYNYKLPDDFTGCVIAWN

>rf 1 hCoV-19/Wuhan/IVDC-HB-05/2019|EPI\_ISL\_402121|2019-12-30  
ADSFVIRGDEVRQIAPGQTGKIADYNYKLPDDFTGCVIAWN

>rf 1 hCoV-19/Wuhan/WIV05/2019|EPI\_ISL\_402128|2019-12-30  
ADSFVIRGDEVRQIAPGQTGKIADYNYKLPDDFTGCVIAWN

>rf 1 hCoV-19/Wuhan/WH03/2020|EPI\_ISL\_406800|2020-01-01  
ADSFVIRGDEVRQIAPGQTGKIADYNYKLPDDFTGCVIAWN

>rf 1 hCoV-19/Wuhan/WIV02/2019|EPI\_ISL\_402127|2019-12-30  
ADSFVIRGDEVRQIAPGQTGKIADYNYKLPDDFTGCVIAWN

>rf 1 hCoV-19/Wuhan/WH01/2019|EPI\_ISL\_406798|2019-12-26  
ADSFVIRGDEVRQIAPGQTGKIADYNYKLPDDFTGCVIAWN

>rf 1 hCoV-19/Wuhan-Hu-1/2019|EPI\_ISL\_402125|2019-12-31  
ADSFVIRGDEVRQIAPGQTGKIADYNYKLPDDFTGCVIAWN

>rf 1 hCoV-19/Wuhan/WH04/2020|EPI\_ISL\_406801|2020-01-05  
ADSFVIRGDEVRQIAPGQTGKIADYNYKLPDDFTGCVIAWN

>rf 1 hCoV-19/Wuhan/IPBCAMS-WH-02/2019|EPI\_ISL\_403931|2019-12-30  
ADSFVIRGDEVRQIAPGQTGKIADYNYKLPDDFTGCVIAWN

>rf 1 hCoV-19/Wuhan/HBCDC-HB-06/2020|EPI\_ISL\_412982|2020-02-07  
ADSFVIRGDEVRQIAPGQTGKIADYNYKLPDDFTGCVIAWN

>rf 1 hCoV-19/Wuhan/HBCDC-HB-05/2020|EPI\_ISL\_412981|2020-01-18  
ADSFVIRGDEVRQIAPGQTGKIADYNYKLPDDFTGCVIAWN

>rf 1 hCoV-19/Wuhan/HBCDC-HB-04/2019|EPI\_ISL\_412900|2019-12-30  
ADSFVIRGDEVRQIAPGQTGKIADYNYKLPDDFTGCVIAWN

>rf 1 hCoV-19/SouthKorea/KUMC03/2020|EPI\_ISL\_413513|2020-02-27  
ADSFVIRGDEVRQIAPGQTGKIADYNYKLPDDFTGCVIAWN

>rf 1 hCoV-19/SouthKorea/KUMC04/2020|EPI\_ISL\_413514|2020-02-27  
ADSFVIRGDEVRQIAPGQTGKIADYNYKLPDDFTGCVIAWN

>rf 1 hCoV-19/SouthKorea/KUMC05/2020|EPI\_ISL\_413515|2020-02-27  
ADSFVIRGDEVRQIAPGQTGKIADYNYKLPDDFTGCVIAWN

>rf 1 hCoV-19/SouthKorea/KUMC06/2020|EPI\_ISL\_413516|2020-02-27  
ADSFVIRGDEVRQIAPGQTGKIADYNYKLPDDFTGCVIAWN

>rf 1 hCoV-19/SouthKorea/KUMC02/2020|EPI\_ISL\_413018|2020-02-06  
ADSFVIRGDEVRQIAPGQTGKIADYNYKLPDDFTGCVIAWN

>rf 1 hCoV-19/SouthKorea/KCDC03/2020|EPI\_ISL\_407193|2020-01-25  
ADSFVIRGDEVRQIAPGQTGKIADYNYKLPDDFTGCVIAWN

>rf 1 hCoV-19/SouthKorea/KUMC01/2020|EPI\_ISL\_413017|2020-02-06  
ADSFVIRGDEVRQIAPGQTGKIADYNYKLPDDFTGCVIAWN

>rf 1 hCoV-19/Korea/KCDC06/2020|EPI\_ISL\_412870|2020-01-30  
ADSFVIRGDEVRQIAPGQTGKIADYNYKLPDDFTGCVIAWN

>rf 1 hCoV-19/Korea/KCDC07/2020|EPI\_ISL\_412871|2020-01-31  
ADSFVIRGDEVRQIAPGQTGKIADYNYKLPDDFTGCVIAWN

>rf 1 hCoV-19/Korea/KCDC12/2020|EPI\_ISL\_412872|2020-02-01  
ADSFVIRGDEVRQIAPGQTGKIADYNYKLPDDFTGCVIAWN

>rf 1 hCoV-19/Korea/KCDC24/2020|EPI\_ISL\_412873|2020-02-06  
ADSFVIRGDEVRQIAPGQTGKIADYNYKLPDDFTGCVIAWN

>rf 1 hCoV-19/Korea/KCDC05/2020|EPI\_ISL\_412869|2020-01-30  
ADSFVIRGDEVRQIAPGQTGKIADYNYKLPDDFTGCVIAWN

>rf 1 hCoV19/SouthKorea/SNU01/2020EPI\_ISL\_411929|2020-01  
ADSFVIRGDEVRQIAPGQTGKIADYNYKLPDDFTGCVIAWN

>rf 1 hCoV-19/Italy/INMI1-isl/2020|EPI\_ISL\_410545|2020-01-29  
ADSFVIRGDEVRQIAPGQTGKIADYNYKLPDDFTGCVIAWN

>rf 1 hCoV-19/Italy/INMI1-cs/2020|EPI\_ISL\_410546|2020-01-31  
ADSFVIRGDEVRQIAPGQTGKIADYNYKLPDDFTGCVIAWN

>rf 1 hCoV-19/Italy/SPL1/2020|EPI\_ISL\_412974|2020-01-29  
ADSFVIRGDEVRQIAPGQTGKIADYNYKLPDDFTGCVIAWN

>rf 1 hCoV-19/Italy/CDG1/2020|EPI\_ISL\_412973|2020-02-20  
ADSFVIRGDEVRQIAPGQTGKIADYNYKLPDDFTGCVIAWN

>rf 1 hCoV-19/Italy/UniSR1/2020|EPI\_ISL\_413489|2020-03-03  
ADSFVIRGDEVRQIAPGQTGKIADYNYKLPDDFTGCVIAWN

>rf 1 MT121215.1:22751-22873 Severe acute respiratory syndrome  
coronavirus 2 isolate SARS-CoV-2/SH01/human/2020/CHN, complete  
genome  
ADSFVIRGDEVRQIAPGQTGKIADYNYKLPDDFTGCVIAWN

>rf 1 MT123292.2:22751-22873 Severe acute respiratory syndrome  
coronavirus 2 isolate SARS-CoV-2/IQTC04/human/2020/CHN, complete  
genome  
ADSFVIRGDEVRQIAPGQTGKIADYNYKLPDDFTGCVIAWN

>rf 1 LC529905.1:22751-22873 Severe acute respiratory syndrome  
coronavirus 2 TKYE6182\_2020 RNA, complete genome  
ADSFVIRGDEVRQIAPGQTGKIADYNYKLPDDFTGCVIAWN

>rf 1 MT163719.1:22751-22873 Severe acute respiratory syndrome  
coronavirus 2 isolate SARS-CoV-2/WA7-UW4/human/2020/USA, complete  
genome  
ADSFVIRGDEVRQIAPGQTGKIADYNYKLPDDFTGCVIAWN

>rf 1 MT163718.1:22751-22873 Severe acute respiratory syndrome  
coronavirus 2 isolate SARS-CoV-2/WA6-UW3/human/2020/USA, complete  
genome  
ADSFVIRGDEVRQIAPGQTGKIADYNYKLPDDFTGCVIAWN

>rf 1 MT163716.1:22751-22873 Severe acute respiratory syndrome  
coronavirus 2 isolate SARS-CoV-2/WA3-UW1/human/2020/USA, complete  
genome  
ADSFVIRGDEVRQIAPGQTGKIADYNYKLPDDFTGCVIAWN

>rf 1 MT135044.1:22751-22873 Severe acute respiratory syndrome

coronavirus 2 isolate SARS-CoV-2/235/human/2020/CHN, complete genome  
ADSFVIRGDEVRQIAPGQTGKIADYNYKLPDDFTGCVIAWN

>rf 1 MT135043.1:22751-22873 Severe acute respiratory syndrome  
coronavirus 2 isolate SARS-CoV-2/233/human/2020/CHN, complete genome  
ADSFVIRGDEVRQIAPGQTGKIADYNYKLPDDFTGCVIAWN

>rf 1 MT135042.1:22751-22873 Severe acute respiratory syndrome  
coronavirus 2 isolate SARS-CoV-2/231/human/2020/CHN, complete genome  
ADSFVIRGDEVRQIAPGQTGKIADYNYKLPDDFTGCVIAWN

>rf 1 MT135041.1:22751-22873 Severe acute respiratory syndrome  
coronavirus 2 isolate SARS-CoV-2/105/human/2020/CHN, complete genome  
ADSFVIRGDEVRQIAPGQTGKIADYNYKLPDDFTGCVIAWN

>rf 1 LC528233.1:22759-22881 Severe acute respiratory syndrome  
coronavirus 2 SARS-CoV-2/Hu/DP/Kng/19-027 RNA, complete genome  
ADSFVIRGDEVRQIAPGQTGKIADYNYKLPDDFTGCVIAWN

>rf 1 LC528232.1:22754-22876 Severe acute respiratory syndrome  
coronavirus 2 SARS-CoV-2/Hu/DP/Kng/19-020 RNA, complete genome  
ADSFVIRGDEVRQIAPGQTGKIADYNYKLPDDFTGCVIAWN

>rf 1 NC\_045512.2:22751-22873 Wuhan seafood market pneumonia virus  
isolate Wuhan-Hu-1, complete genome  
ADSFVIRGDEVRQIAPGQTGKIADYNYKLPDDFTGCVIAWN

>rf 1 MN908947.3:22751-22873 Severe acute respiratory syndrome  
coronavirus 2 isolate Wuhan-Hu-1, complete genome  
ADSFVIRGDEVRQIAPGQTGKIADYNYKLPDDFTGCVIAWN

>rf 1 MT049951.1:22751-22873 Severe acute respiratory syndrome  
coronavirus 2 isolate SARS-CoV-2/Yunnan-01/human/2020/CHN, complete  
genome  
ADSFVIRGDEVRQIAPGQTGKIADYNYKLPDDFTGCVIAWN

>rf 1 MT019529.1:22751-22873 Severe acute respiratory syndrome  
coronavirus 2 isolate BetaCoV/Wuhan/IPBCAMS-WH-01/2019, complete  
genome  
ADSFVIRGDEVRQIAPGQTGKIADYNYKLPDDFTGCVIAWN

>rf 1 MT019531.1:22751-22873 Severe acute respiratory syndrome  
coronavirus 2 isolate BetaCoV/Wuhan/IPBCAMS-WH-03/2019, complete  
genome  
ADSFVIRGDEVRQIAPGQTGKIADYNYKLPDDFTGCVIAWN

>rf 1 MT163717.1:22745-22867 Severe acute respiratory syndrome  
coronavirus 2 isolate SARS-CoV-2/WA4-UW2/human/2020/USA, complete  
genome  
ADSFVIRGDEVRQIAPGQTGKIADYNYKLPDDFTGCVIAWN

>rf 1 MT192773.1:22750-22872 Severe acute respiratory syndrome  
coronavirus 2 isolate SARS-CoV-2/nCoV-19-02S/human/2020/VNM,  
complete genome

ADSFVIRGDEVRQIAPGQTGKIADYNYKLPDDFTGCVIAWN

>rf 1 MT192772.1:22751-22873 Severe acute respiratory syndrome coronavirus 2 isolate SARS-CoV-2/nCoV-19-01S/human/2020/VNM, complete genome

ADSFVIRGDEVRQIAPGQTGKIADYNYKLPDDFTGCVIAWN

>rf 1 MT123290.1:22754-22876 Severe acute respiratory syndrome coronavirus 2 isolate SARS-CoV-2/IQTC01/human/2020/CHN, complete genome

ADSFVIRGDEVRQIAPGQTGKIADYNYKLPDDFTGCVIAWN

>rf 1 MN975262.1:22751-22873 Severe acute respiratory syndrome coronavirus 2 isolate 2019-nCoV\_HKU-SZ-005b\_2020, complete genome

ADSFVIRGDEVRQIAPGQTGKIADYNYKLPDDFTGCVIAWN

>rf 1 MN996528.1:22751-22873 Severe acute respiratory syndrome coronavirus 2 isolate WIV04, complete genome

ADSFVIRGDEVRQIAPGQTGKIADYNYKLPDDFTGCVIAWN

>rf 1 MT019530.1:22751-22873 Severe acute respiratory syndrome coronavirus 2 isolate BetaCoV/Wuhan/IPBCAMS-WH-02/2019, complete genome

ADSFVIRGDEVRQIAPGQTGKIADYNYKLPDDFTGCVIAWN

>rf 1 MT019532.1:22751-22873 Severe acute respiratory syndrome coronavirus 2 isolate BetaCoV/Wuhan/IPBCAMS-WH-04/2019, complete genome

ADSFVIRGDEVRQIAPGQTGKIADYNYKLPDDFTGCVIAWN

>rf 1 MT093571.1:22751-22873 Severe acute respiratory syndrome coronavirus 2 isolate SARS-CoV-2/01/human/2020/SWE, complete genome

ADSFVIRGDEVRQIAPGQTGKIADYNYKLPDDFTGCVIAWN

>rf 1 MN994468.1:22751-22873 Severe acute respiratory syndrome coronavirus 2 isolate 2019-nCoV/USA-CA2/2020, complete genome

ADSFVIRGDEVRQIAPGQTGKIADYNYKLPDDFTGCVIAWN

>rf 1 MT019533.1:22751-22873 Severe acute respiratory syndrome coronavirus 2 isolate BetaCoV/Wuhan/IPBCAMS-WH-05/2020, complete genome

ADSFVIRGDEVRQIAPGQTGKIADYNYKLPDDFTGCVIAWN

>rf 1 MT123291.2:22748-22870 Severe acute respiratory syndrome coronavirus 2 isolate SARS-CoV-2/IQTC02/human/2020/CHN, complete genome

ADSFVIRGDEVRQIAPGQTGKIADYNYKLPDDFTGCVIAWN

>rf 1 MT159722.1:22751-22873 Severe acute respiratory syndrome coronavirus 2 isolate 2019-nCoV/USA-CruiseA-6/2020, complete genome

ADSFVIRGDEVRQIAPGQTGKIADYNYKLPDDFTGCVIAWN

>rf 1 MT159721.1:22751-22873 Severe acute respiratory syndrome coronavirus 2 isolate 2019-nCoV/USA-CruiseA-5/2020, complete genome

ADSFVIRGDEVRQIAPGQTGKIADYNYKLPDDFTGCVIAWN

>rf 1 MT159720.1:22751-22873 Severe acute respiratory syndrome coronavirus 2 isolate 2019-nCoV/USA-CruiseA-4/2020, complete genome  
ADSFVIRGDEVRQIAPGQTGKIADYNYKLPDDFTGCVIAWN

>rf 1 MT159719.1:22751-22873 Severe acute respiratory syndrome coronavirus 2 isolate 2019-nCoV/USA-CruiseA-3/2020, complete genome  
ADSFVIRGDEVRQIAPGQTGKIADYNYKLPDDFTGCVIAWN

>rf 1 MT159718.1:22751-22873 Severe acute respiratory syndrome coronavirus 2 isolate 2019-nCoV/USA-CruiseA-2/2020, complete genome  
ADSFVIRGDEVRQIAPGQTGKIADYNYKLPDDFTGCVIAWN

>rf 1 MT159717.1:22751-22873 Severe acute respiratory syndrome coronavirus 2 isolate 2019-nCoV/USA-CruiseA-1/2020, complete genome  
ADSFVIRGDEVRQIAPGQTGKIADYNYKLPDDFTGCVIAWN

>rf 1 MT159715.1:22751-22873 Severe acute respiratory syndrome coronavirus 2 isolate 2019-nCoV/USA-CruiseA-17/2020, complete genome  
ADSFVIRGDEVRQIAPGQTGKIADYNYKLPDDFTGCVIAWN

>rf 1 MT159714.1:22751-22873 Severe acute respiratory syndrome coronavirus 2 isolate 2019-nCoV/USA-CruiseA-16/2020, complete genome  
ADSFVIRGDEVRQIAPGQTGKIADYNYKLPDDFTGCVIAWN

>rf 1 MT159713.1:22751-22873 Severe acute respiratory syndrome coronavirus 2 isolate 2019-nCoV/USA-CruiseA-15/2020, complete genome  
ADSFVIRGDEVRQIAPGQTGKIADYNYKLPDDFTGCVIAWN

>rf 1 MT159712.1:22751-22873 Severe acute respiratory syndrome coronavirus 2 isolate 2019-nCoV/USA-CruiseA-14/2020, complete genome  
ADSFVIRGDEVRQIAPGQTGKIADYNYKLPDDFTGCVIAWN

>rf 1 MT159711.1:22751-22873 Severe acute respiratory syndrome coronavirus 2 isolate 2019-nCoV/USA-CruiseA-13/2020, complete genome  
ADSFVIRGDEVRQIAPGQTGKIADYNYKLPDDFTGCVIAWN

>rf 1 MT159710.1:22751-22873 Severe acute respiratory syndrome coronavirus 2 isolate 2019-nCoV/USA-CruiseA-9/2020, complete genome  
ADSFVIRGDEVRQIAPGQTGKIADYNYKLPDDFTGCVIAWN

>rf 1 MT159709.1:22751-22873 Severe acute respiratory syndrome coronavirus 2 isolate 2019-nCoV/USA-CruiseA-12/2020, complete genome  
ADSFVIRGDEVRQIAPGQTGKIADYNYKLPDDFTGCVIAWN

>rf 1 MT159708.1:22751-22873 Severe acute respiratory syndrome coronavirus 2 isolate 2019-nCoV/USA-CruiseA-11/2020, complete genome  
ADSFVIRGDEVRQIAPGQTGKIADYNYKLPDDFTGCVIAWN

>rf 1 MT159707.1:22751-22873 Severe acute respiratory syndrome coronavirus 2 isolate 2019-nCoV/USA-CruiseA-10/2020, complete genome  
ADSFVIRGDEVRQIAPGQTGKIADYNYKLPDDFTGCVIAWN

>rf 1 MT159706.1:22751-22873 Severe acute respiratory syndrome coronavirus 2 isolate 2019-nCoV/USA-CruiseA-8/2020, complete genome ADSFVIRGDEVRQIAPGQTGKIADYNYKLPDDFTGCVIAWN

>rf 1 MT159705.1:22751-22873 Severe acute respiratory syndrome coronavirus 2 isolate 2019-nCoV/USA-CruiseA-7/2020, complete genome ADSFVIRGDEVRQIAPGQTGKIADYNYKLPDDFTGCVIAWN

>rf 1 MN985325.1:22751-22873 Severe acute respiratory syndrome coronavirus 2 isolate 2019-nCoV/USA-WA1/2020, complete genome ADSFVIRGDEVRQIAPGQTGKIADYNYKLPDDFTGCVIAWN

>rf 1 MN988668.1:22750-22872 Severe acute respiratory syndrome coronavirus 2 isolate 2019-nCoV WHU01, complete genome ADSFVIRGDEVRQIAPGQTGKIADYNYKLPDDFTGCVIAWN

>rf 1 MN988669.1:22750-22872 Severe acute respiratory syndrome coronavirus 2 isolate 2019-nCoV WHU02, complete genome ADSFVIRGDEVRQIAPGQTGKIADYNYKLPDDFTGCVIAWN

>rf 1 MN988713.1:22751-22873 Severe acute respiratory syndrome coronavirus 2 isolate 2019-nCoV/USA-IL1/2020, complete genome ADSFVIRGDEVRQIAPGQTGKIADYNYKLPDDFTGCVIAWN

>rf 1 MN994467.1:22751-22873 Severe acute respiratory syndrome coronavirus 2 isolate 2019-nCoV/USA-CA1/2020, complete genome ADSFVIRGDEVRQIAPGQTGKIADYNYKLPDDFTGCVIAWN

>rf 1 MN997409.1:22751-22873 Severe acute respiratory syndrome coronavirus 2 isolate 2019-nCoV/USA-AZ1/2020, complete genome ADSFVIRGDEVRQIAPGQTGKIADYNYKLPDDFTGCVIAWN

>rf 1 MT020880.1:22751-22873 Severe acute respiratory syndrome coronavirus 2 isolate 2019-nCoV/USA-WA1-A12/2020, complete genome ADSFVIRGDEVRQIAPGQTGKIADYNYKLPDDFTGCVIAWN

>rf 1 MT020881.1:22751-22873 Severe acute respiratory syndrome coronavirus 2 isolate 2019-nCoV/USA-WA1-F6/2020, complete genome ADSFVIRGDEVRQIAPGQTGKIADYNYKLPDDFTGCVIAWN

>rf 1 MT027062.1:22751-22873 Severe acute respiratory syndrome coronavirus 2 isolate 2019-nCoV/USA-CA3/2020, complete genome ADSFVIRGDEVRQIAPGQTGKIADYNYKLPDDFTGCVIAWN

>rf 1 MT027063.1:22751-22873 Severe acute respiratory syndrome coronavirus 2 isolate 2019-nCoV/USA-CA4/2020, complete genome ADSFVIRGDEVRQIAPGQTGKIADYNYKLPDDFTGCVIAWN

>rf 1 MT027064.1:22751-22873 Severe acute respiratory syndrome coronavirus 2 isolate 2019-nCoV/USA-CA5/2020, complete genome ADSFVIRGDEVRQIAPGQTGKIADYNYKLPDDFTGCVIAWN

>rf 1 MT039888.1:22751-22873 Severe acute respiratory syndrome coronavirus 2 isolate 2019-nCoV/USA-MA1/2020, complete genome

ADSFVIRGDEVRQIAPGQTGKIADYNYKLPDDFTGCVIAWN

>rf 1 MT044257.1:22751-22873 Severe acute respiratory syndrome coronavirus 2 isolate 2019-nCoV/USA-IL2/2020, complete genome  
ADSFVIRGDEVRQIAPGQTGKIADYNYKLPDDFTGCVIAWN

>rf 1 MT106052.1:22751-22873 Severe acute respiratory syndrome coronavirus 2 isolate 2019-nCoV/USA-CA7/2020, complete genome  
ADSFVIRGDEVRQIAPGQTGKIADYNYKLPDDFTGCVIAWN

>rf 1 MT106053.1:22751-22873 Severe acute respiratory syndrome coronavirus 2 isolate 2019-nCoV/USA-CA8/2020, complete genome  
ADSFVIRGDEVRQIAPGQTGKIADYNYKLPDDFTGCVIAWN

>rf 1 MT106054.1:22751-22873 Severe acute respiratory syndrome coronavirus 2 isolate 2019-nCoV/USA-TX1/2020, complete genome  
ADSFVIRGDEVRQIAPGQTGKIADYNYKLPDDFTGCVIAWN

>rf 1 MT118835.1:22751-22873 Severe acute respiratory syndrome coronavirus 2 isolate 2019-nCoV/USA-CA9/2020, complete genome  
ADSFVIRGDEVRQIAPGQTGKIADYNYKLPDDFTGCVIAWN

>rf 1 MT152824.1:22749-22871 Severe acute respiratory syndrome coronavirus 2 isolate SARS-CoV-2/WA2/human/2020/USA, complete genome  
ADSFVIRGDEVRQIAPGQTGKIADYNYKLPDDFTGCVIAWN

>rf 1 MT039887.1:22748-22870 Severe acute respiratory syndrome coronavirus 2 isolate 2019-nCoV/USA-WI1/2020, complete genome  
ADSFVIRGDEVRQIAPGQTGKIADYNYKLPDDFTGCVIAWN

>rf 1 MT126808.1:22751-22873 Severe acute respiratory syndrome coronavirus 2 isolate SARS-CoV-2/SP02/human/2020/BRA, complete genome  
ADSFVIRGDEVRQIAPGQTGKIADYNYKLPDDFTGCVIAWN

>rf 1 MT123293.2:22745-22867 Severe acute respiratory syndrome coronavirus 2 isolate SARS-CoV-2/IQTC03/human/2020/CHN, complete genome  
ADSFVIRGDEVRQIAPGQTGKIADYNYKLPDDFTGCVIAWN

>rf 1 LR757995.1:22736-22858 Wuhan seafood market pneumonia virus genome assembly, chromosome: whole\_genome  
ADSFVIRGDEVRQIAPGQTGKIADYNYKLPDDFTGCVIAWN

>rf 1 LR757996.1:22731-22853 Wuhan seafood market pneumonia virus genome assembly, chromosome: whole\_genome  
ADSFVIRGDEVRQIAPGQTGKIADYNYKLPDDFTGCVIAWN

>rf 1 MT066175.1:22751-22873 Severe acute respiratory syndrome coronavirus 2 isolate SARS-CoV-2/NTU01/2020/TWN, complete genome  
ADSFVIRGDEVRQIAPGQTGKIADYNYKLPDDFTGCVIAWN

>rf 1 MT066176.1:22751-22873 Severe acute respiratory syndrome coronavirus 2 isolate SARS-CoV-2/NTU02/2020/TWN, complete genome



ADSFVIRGDEVRQIAPGQTGKIADYNYKLPDDFTGCVIAWN

>rf 1 MT066156.1:22751-22873 Severe acute respiratory syndrome coronavirus 2 isolate SARS-CoV-2/INMI1/human/2020/ITA, complete genome

ADSFVIRGDEVRQIAPGQTGKIADYNYKLPDDFTGCVIAWN

>rf 1 MT159716.1:22736-22858 Severe acute respiratory syndrome coronavirus 2 isolate 2019-nCoV/USA-CruiseA-18/2020, complete genome

ADSFVIRGDEVRQIAPGQTGKIADYNYKLPDDFTGCVIAWN

>rf 1 LR757998.1:22726-22848 Wuhan seafood market pneumonia virus genome assembly, chromosome: whole\_genome

ADSFVIRGDEVRQIAPGQTGKIADYNYKLPDDFTGCVIAWN

>rf 1 MT192759.1:22724-22846 Severe acute respiratory syndrome coronavirus 2 isolate SARS-CoV-2/CGMH-CGU-01/human2020/TWN, complete genome

ADSFVIRGDEVRQIAPGQTGKIADYNYKLPDDFTGCVIAWN

>rf 1 MT093631.2:22738-22860 Severe acute respiratory syndrome coronavirus 2 isolate SARS-CoV-2/WH-09/human/2020/CHN, complete genome

ADSFVIRGDEVRQIAPGQTGKIADYNYKLPDDFTGCVIAWN

>rf 1 MN996531.1:22738-22860 Severe acute respiratory syndrome coronavirus 2 isolate WIV07, complete genome

ADSFVIRGDEVRQIAPGQTGKIADYNYKLPDDFTGCVIAWN

>rf 1 MT044258.1:22727-22849 Severe acute respiratory syndrome coronavirus 2 isolate 2019-nCoV/USA-CA6/2020, complete genome

ADSFVIRGDEVRQIAPGQTGKIADYNYKLPDDFTGCVIAWN

>rf 1 MN996530.1:22737-22859 Severe acute respiratory syndrome coronavirus 2 isolate WIV06, complete genome

ADSFVIRGDEVRQIAPGQTGKIADYNYKLPDDFTGCVIAWN

>rf 1 MT050493.1:22731-22853 Severe acute respiratory syndrome coronavirus 2 isolate SARS-CoV-2/166/human/2020/IND, complete genome

ADSFVIRGDEVRQIAPGQTGKIADYNYKLPDDFTGCVIAWN

>rf 1 MN996529.1:22739-22861 Severe acute respiratory syndrome coronavirus 2 isolate WIV05, complete genome

ADSFVIRGDEVRQIAPGQTGKIADYNYKLPDDFTGCVIAWN

>rf 1 MT020781.1:22739-22861 Severe acute respiratory syndrome coronavirus 2 isolate nCoV-FIN-29-Jan-2020, partial genome

ADSFVIRGDEVRQIAPGQTGKIADYNYKLPDDFTGCVIAWN

>rf 1 MT188340.1:22697-22819 Severe acute respiratory syndrome coronavirus 2 isolate USA/MN2-MDH2/2020, complete genome

ADSFVIRGDEVRQIAPGQTGKIADYNYKLPDDFTGCVIAWN

>rf 1 MN938384.1:22719-22841 Severe acute respiratory syndrome

coronavirus 2 isolate 2019-nCoV\_HKU-SZ-002a\_2020, complete genome  
ADSFVIRGDEVRQIAPGQTGKIADYNYKLPDDFTGCVIAWN

>rf 1 MT188341.1:22700-22822 Severe acute respiratory syndrome  
coronavirus 2 isolate USA/MN1-MDH1/2020, complete genome  
ADSFVIRGDEVRQIAPGQTGKIADYNYKLPDDFTGCVIAWN

>rf 1 MT039873.1:22748-22870 Severe acute respiratory syndrome  
coronavirus 2 isolate HZ-1, complete genome  
ADSFVIRGDEVRQIAPGQTGKIADYNYKLPDDFTGCVIAWN

>rf 1 MN996527.1:22718-22840 Severe acute respiratory syndrome  
coronavirus 2 isolate WIV02, complete genome  
ADSFVIRGDEVRQIAPGQTGKIADYNYKLPDDFTGCVIAWN

>rf 1 MT072688.1:22736-22858 Severe acute respiratory syndrome  
coronavirus 2 isolate SARS0CoV-2/61-TW/human/2020/ NPL, complete  
genome  
ADSFVIRGDEVRQIAPGQTGKIADYNYKLPDDFTGCVIAWN

>rf 1 MT188339.1:22697-22819 Severe acute respiratory syndrome  
coronavirus 2 isolate USA/MN3-MDH3/2020, complete genome  
ADSFVIRGDEVRQIAPGQTGKIADYNYKLPDDFTGCVIAWN

>rf 1 MT163720.1:22580-22702 Severe acute respiratory syndrome  
coronavirus 2 isolate SARS-CoV-2/WA8-UW5/human/2020/USA, partial  
genome  
ADSFVIRGDEVRQIAPGQTGKIADYNYKLPDDFTGCVIAWN

>rf 1 MT163721.1:22173-22295 Severe acute respiratory syndrome  
coronavirus 2 isolate SARS-CoV-2/WA9-UW6/human/2020/USA, partial  
genome  
ADSFVIRGDEVRQIAPGQTGKIADYNYKLPDDFTGCVIAWN

>rf 1 MT007544.1:22751-22873 Severe acute respiratory syndrome  
coronavirus 2 isolate Australia/VIC01/2020, complete genome  
ADSFVIRGDEVRQIAPGQTGKIADYNYKLPDDFTGCVIAWN

>rf 1 MT192765.1:22744-22866 Severe acute respiratory syndrome  
coronavirus 2 isolate SARS-CoV-2/PC00101P/human/2020/USA, complete  
genome  
ADSFVIRGDEVRQIAPGQTGKIADYNYKLPDDFTGCVIAWN

>rf 1 MT039890.1:22751-22873 Severe acute respiratory syndrome  
coronavirus 2 isolate SNU01, complete genome  
ADSFVIRGDEVRQIAPGQTGKIADYNYKLPDDFTGCVIAWN

>rf 1 MT084071.1:20880-21002 Pangolin coronavirus isolate MP789  
genomic sequence  
ADSFVIRGDEVRQIAPGQTGRIADYNYKLPDDFTGCVIAWN

>rf 1 MT012098.1:22735-22857 Severe acute respiratory syndrome  
coronavirus 2 isolate SARS-CoV-2/29/human/2020/IND, complete genome  
ADSFVIRGDEVIQIAPGQTGKIADYNYKLPDDFTGCVIAWN

>rf 1 CQ918719.1:26-148 Sequence 136 from Patent W02004096842  
ADSLVVKGDDVRQIAPGQTGVIADYNYKLPDDFMGCVLAWN

>rf 1 KF367457.1:22644-22766 Bat SARS-like coronavirus WIV1,  
complete genome  
ADSFVVKGDDVRQIAPGQTGVIADYNYKLPDDFTGCVLAWN

>rf 1 KC881007.1:1153-1275 Bat SARS-like coronavirus WIV1 spike  
protein (S) gene, complete cds  
ADSFVVKGDDVRQIAPGQTGVIADYNYKLPDDFTGCVLAWN

>rf 1 KC881006.1:22644-22766 Bat SARS-like coronavirus Rs3367,  
complete genome  
ADSFVVKGDDVRQIAPGQTGVIADYNYKLPDDFTGCVLAWN
